# Supplementary material for: Bimekizumab treatment in patients with active psoriatic arthritis and prior inadequate response to tumour necrosis factor inhibitors: 52-week safety and efficacy from the phase III BE COMPLETE study and its open-label extension BE VITAL
Source: PubMed Central journal article supplement — RMD Open. 2024 Feb 22;10(1):e003855. doi: 10.1136/rmdopen-2023-003855 (PMC10884206; doi:10.1136/rmdopen-2023-003855), 2024-02-22
Supplement: rmdopen-2023-003855supp001.pdf [file rmdopen-2023-003855supp001.pdf]

1 **SUPPLEMENTARY APPENDIX**2 **Supplementary Figure 1. Study design**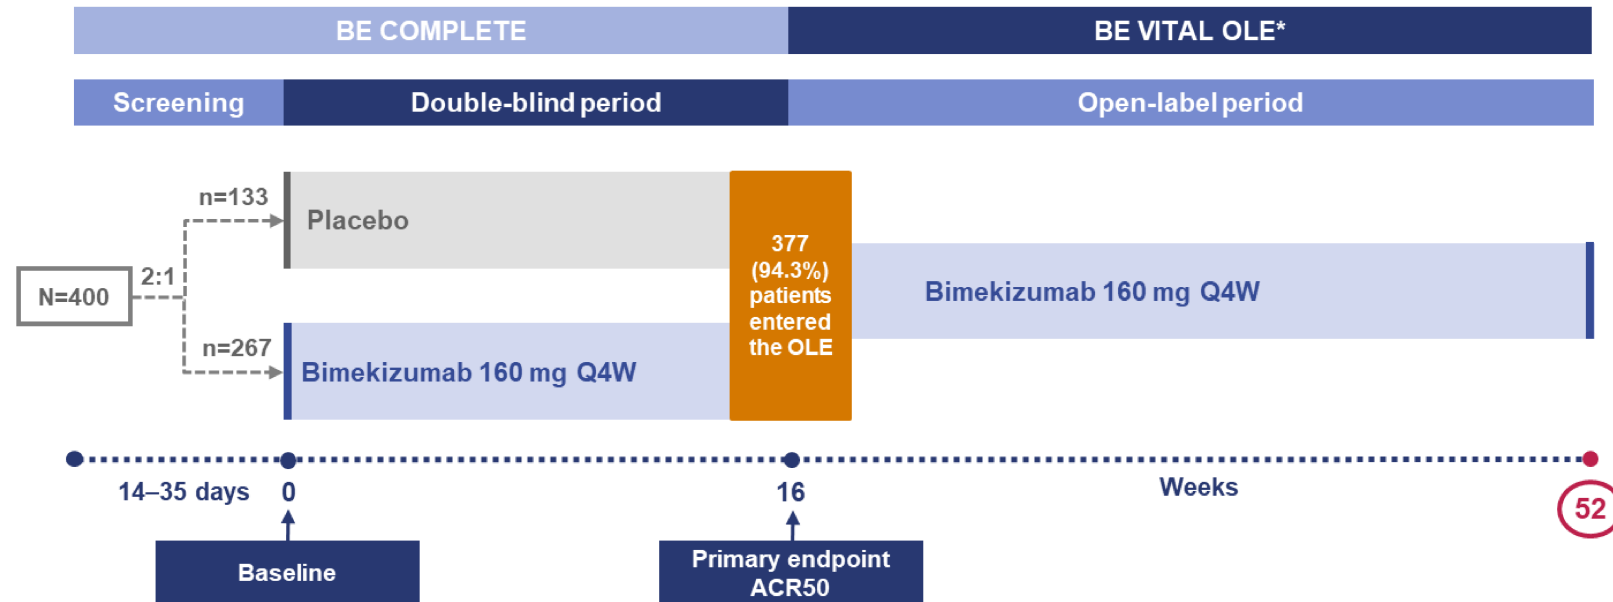

3

4

5 \*BE VITAL includes patients from the BE OPTIMAL or BE COMPLETE studies; results here are only presented for patients from BE COMPLETE. ACR: American College of  
 6 Rheumatology; BKZ: bimekizumab; OLE: open-label extension; Q4W: every 4 weeks; TNFi: tumour necrosis factor inhibitor.

1 **Supplementary Table 1. Baseline patient demographics and disease**2 **characteristics**

| Patient Demographics                                                             | Placebo<br>n=133 | BKZ 160 mg<br>Q4W<br>n=267 | All patients<br>N=400 |
|----------------------------------------------------------------------------------|------------------|----------------------------|-----------------------|
| Age, years, mean (SD)                                                            | 51.3 (12.9)      | 50.1 (12.4)                | 50.5 (12.5)           |
| Sex, male, n (%)                                                                 | 60 (45.1)        | 130 (48.7)                 | 190 (47.5)            |
| BMI, kg/m <sup>2</sup> , <sup>a</sup> mean (SD)                                  | 29.0 (5.4)       | 30.1 (6.5)                 | 29.8 (6.2)            |
| Race, white, <sup>b</sup> n (%)                                                  | 128 (96.2)       | 256 (95.9)                 | 384 (96.0)            |
| Time since first diagnosis of psoriatic arthritis, <sup>c</sup> years, mean (SD) | 9.2 (8.1)        | 9.6 (9.9)                  | 9.5 (9.3)             |
| Use of conventional synthetic DMARD at baseline, n (%)                           | 63 (47.4)        | 139 (52.1)                 | 202 (50.5)            |
| Methotrexate                                                                     | 51 (38.3)        | 119 (44.6)                 | 170 (42.5)            |
| Prior TNFi exposure, n (%)                                                       |                  |                            |                       |
| Inadequate response to 1 TNFi                                                    | 103 (77.4)       | 204 (76.4)                 | 307 (76.8)            |
| Inadequate response to 2 TNFi                                                    | 15 (11.3)        | 29 (10.9)                  | 44 (11.0)             |
| Intolerance to TNFi                                                              | 15 (11.3)        | 34 (12.7)                  | 49 (12.3)             |
| Tender joint count (of 68 joints), mean (SD)                                     | 19.3 (14.2)      | 18.4 (13.5)                | 18.7 (13.8)           |
| Swollen joint count (of 66 joints), mean (SD)                                    | 10.3 (8.2)       | 9.7 (7.5)                  | 9.9 (7.7)             |
| hs-CRP ≥6 mg/L, n (%)                                                            | 59 (44.4)        | 118 (44.2)                 | 177 (44.3)            |
| Psoriasis with ≥3% BSA, n (%)                                                    | 88 (66.2)        | 176 (65.9)                 | 264 (66.0)            |
| PASI score, <sup>d</sup> mean (SD)                                               | 8.5 (6.6)        | 10.1 (9.1)                 | 9.6 (8.4)             |
| HAQ-DI score, mean (SD)                                                          | 1.04 (0.69)      | 0.97 (0.59)                | 0.99 (0.62)           |
| PtAAP score, mean (SD)                                                           | 61.7 (24.6)      | 58.3 (24.2)                | 59.5 (24.3)           |
| PhGA-PsA score, <sup>e</sup> mean (SD)                                           | 57.7 (18.8)      | 59.3 (17.2)                | 58.7 (17.7)           |
| PGA-PsA score, mean (SD)                                                         | 63.0 (22.0)      | 60.5 (22.5)                | 61.4 (22.3)           |
| SF-36 PCS score, mean (SD)                                                       | 35.9 (10.2)      | 36.4 (9.0)                 | 36.3 (9.4)            |
| PsAID-12 total score, mean (SD)                                                  | 4.4 (2.0)        | 4.5 (2.1)                  | 4.5 (2.0)             |
| FACIT-Fatigue score, mean (SD)                                                   | 36.3 (9.9)       | 35.3 (10.5)                | 35.6 (10.3)           |
| Nail psoriasis (mNAPSI >0), <sup>e</sup> n (%)                                   | 83 (62.4)        | 159 (59.6)                 | 242 (60.5)            |
| mNAPSI score, <sup>f</sup> mean (SD)                                             | 4.5 (2.8)        | 4.3 (2.8)                  | 4.4 (2.8)             |
| Dactylitis (LDI >0), <sup>e,g</sup> n (%)                                        | 14 (10.5)        | 34 (12.7)                  | 48 (12.0)             |
| LDI score in patients with dactylitis, <sup>h</sup> mean (SD)                    | 66.4 (127.6)     | 72.7 (114.4)               | 70.9 (117.0)          |
| Enthesitis (LEI >0), <sup>e,i</sup> n (%)                                        | 36 (27.1)        | 106 (39.7)                 | 142 (35.5)            |
| LEI score in patients with enthesitis, <sup>j</sup> mean (SD)                    | 2.9 (1.6)        | 2.6 (1.5)                  | 2.7 (1.5)             |
| Enthesitis (SPARCC >0), <sup>e,k</sup> n (%)                                     | 51 (38.3)        | 122 (45.7)                 | 173 (43.3)            |
| SPARCC score in patients with enthesitis, <sup>j</sup> mean (SD)                 | 4.6 (3.5)        | 4.8 (3.7)                  | 4.8 (3.6)             |

3

1 [a] The body-mass index is the weight in kilograms divided by the square of the height in meters. [b]  
2 Race was reported by the patient; [c] Data missing for 1 placebo patient; 1 BKZ patient; [d] In patients  
3 with psoriasis affecting  $\geq 3\%$  BSA at baseline; [e] Data missing for 1 placebo patient; [f] In patients  
4 with nail psoriasis at baseline; [g] Dactylitis defined by LDI  $>0$ ; [h] In patients with dactylitis at  
5 baseline; [i] Enthesitis defined by LEI  $>0$ ; [j] In patients with enthesitis at baseline; [k] Enthesitis  
6 defined by SPARCC  $>0$ . BKZ: bimekizumab; BMI: body mass index; DMARD: disease-modifying  
7 antirheumatic drug; HAQ-DI: Health Assessment Questionnaire-Disability Index; hs-CRP: high-sensitivity  
8 C-reactive protein; LDI: Leeds Dactylitis Index; LEI: Leeds Enthesitis Index; PASI: Psoriasis Area and  
9 Severity Index; PGA-PsA: Patient's Global Assessment of Psoriatic Arthritis; PhGA-PsA: Physician's Global  
10 Assessment of Psoriatic Arthritis; PsAID-12: Psoriatic Arthritis Impact of Disease-12; PtAAP: Patient's  
11 Assessment of Arthritis Pain; Q4W: every four weeks; SF-36 PCS: Short-Form 36-item Health Survey  
12 Physical Component Summary; SD: standard deviation; SPARCC: Spondyloarthritis Research Consortium  
13 of Canada; TNFi: tumour necrosis factor inhibitor.

1 **Supplementary Table 2. Fungal infections to Week 16 and Week 52**

| n (%) [EAIR] <sup>a</sup>                                    | Weeks 0–16<br>(Double-blind period) |                                         | Weeks 16–52 (Open-label period)                                 | Weeks 0–52<br>(Overall study period)     |                                                                |
|--------------------------------------------------------------|-------------------------------------|-----------------------------------------|-----------------------------------------------------------------|------------------------------------------|----------------------------------------------------------------|
|                                                              | Placebo<br>n=132<br>(PYAR: 42.5)    | BKZ 160 mg Q4W<br>n=267<br>(PYAR: 87.1) | Placebo/BKZ 160 mg<br>Q4W <sup>b</sup><br>n=121<br>(PYAR: 80.3) | BKZ 160 mg Q4W<br>n=267<br>(PYAR: 259.5) | BKZ 160 mg Q4W<br>Total <sup>b</sup><br>n=388<br>(PYAR: 339.8) |
| Fungal infections                                            | 0                                   | 12 (4.5)                                | 12 (9.9) [16.0]                                                 | 25 (9.4) [10.3]                          | 37 (9.5) [11.6]                                                |
| <i>Candida</i> infections                                    | 0                                   | 7 (2.6)                                 | 8 (6.6) [10.4] <sup>c</sup>                                     | 17 (6.4) [6.8]                           | 25 (6.4) [7.7] <sup>c</sup>                                    |
| Oral candidiasis                                             | 0                                   | 7 (2.6)                                 | 7 (5.8) [9.0]                                                   | 17 (6.4) [6.8]                           | 24 (6.2) [7.3]                                                 |
| Oesophageal candidiasis                                      | 0                                   | 0                                       | 2 (1.7) [2.5]                                                   | 0                                        | 2 (0.5) [0.6]                                                  |
| Fungal infections NEC (HLT)                                  | 0                                   | 4 (1.5)                                 | 3 (2.5) [3.8]                                                   | 9 (3.4) [3.5]                            | 12 (3.1) [3.6]                                                 |
| Fungal skin infection                                        | 0                                   | 1 (0.4)                                 | 1 (0.8) [1.3]                                                   | 3 (1.1) [1.2]                            | 4 (1.0) [1.2]                                                  |
| Vulvovaginal mycotic infection                               | 0                                   | 2 (0.7)                                 | 1 (0.8) [1.3]                                                   | 3 (1.1) [1.2]                            | 4 (1.0) [1.2]                                                  |
| Oral fungal infection                                        | 0                                   | 0                                       | 1 (0.8) [1.3]                                                   | 1 (0.4) [0.4]                            | 2 (0.5) [0.6]                                                  |
| Eye infection fungal                                         | 0                                   | 0                                       | 0                                                               | 1 (0.4) [0.4]                            | 1 (0.3) [0.3]                                                  |
| Tongue fungal infection                                      | 0                                   | 1 (0.4)                                 | 0                                                               | 1 (0.4) [0.4]                            | 1 (0.3) [0.3]                                                  |
| Tinea infections                                             | 0                                   | 1 (0.4)                                 | 2 (1.7) [2.5]                                                   | 2 (0.7) [0.8] <sup>d</sup>               | 4 (1.0) [1.2] <sup>d</sup>                                     |
| Body tinea                                                   | 0                                   | 0                                       | 0                                                               | 1 (0.4) [0.4]                            | 1 (0.3) [0.3]                                                  |
| Tinea infection                                              | 0                                   | 0                                       | 0                                                               | 1 (0.4) [0.4]                            | 1 (0.3) [0.3]                                                  |
| Tinea pedis                                                  | 0                                   | 1 (0.4)                                 | 0                                                               | 1 (0.4) [0.4]                            | 1 (0.3) [0.3]                                                  |
| Tinea cruris                                                 | 0                                   | 0                                       | 1 (0.8) [1.3]                                                   | 0                                        | 1 (0.3) [0.3]                                                  |
| Tinea versicolor                                             | 0                                   | 0                                       | 1 (0.8) [1.3]                                                   | 0                                        | 1 (0.3) [0.3]                                                  |
| Serious fungal infections                                    | 0                                   | 0                                       | 0                                                               | 0                                        | 0                                                              |
| Fungal infections NEC (HLT) leading to study discontinuation | 0                                   | 0                                       | 1 (0.8) [1.3] <sup>e</sup>                                      | 0                                        | 1 (0.3) [0.3] <sup>e</sup>                                     |

|                                                            |   |         |   |                            |                            |
|------------------------------------------------------------|---|---------|---|----------------------------|----------------------------|
| <i>Candida</i> infections leading to study discontinuation | 0 | 1 (0.4) | 0 | 2 (0.7) [0.8] <sup>f</sup> | 2 (0.5) [0.6] <sup>f</sup> |
|------------------------------------------------------------|---|---------|---|----------------------------|----------------------------|

- 1 Safety set (all randomised subjects who received at least one dose of the study drug); one placebo-randomised patient withdrew from the study before receiving study drug.  
2 [a] EAIRs are reported for treatment duration greater than 16 weeks, where available; [b] Includes patients who switched from placebo to BKZ and only includes TEAEs  
3 occurring whilst receiving BKZ; [c] 1 patient had both oral candidiasis and oesophageal candidiasis infection; [d] 1 patient had both body tinea and tinea infection; [e] 1 fungal  
4 skin infection; [f] 2 oral candidiasis, 1 during the double-blind period and 1 during the open label period. BKZ: bimekizumab; EAIR: exposure-adjusted incidence rate;  
5 HLT: high-level term; NEC: not elsewhere classified; PYAR: patient-years at risk; Q4W: every 4 weeks.

### 1 Supplementary Figure 2. Fungal infections to Week 16 and Week 52

A) Incidence rates of fungal infections, *Candida* infections and oral candidiasis by treatment period

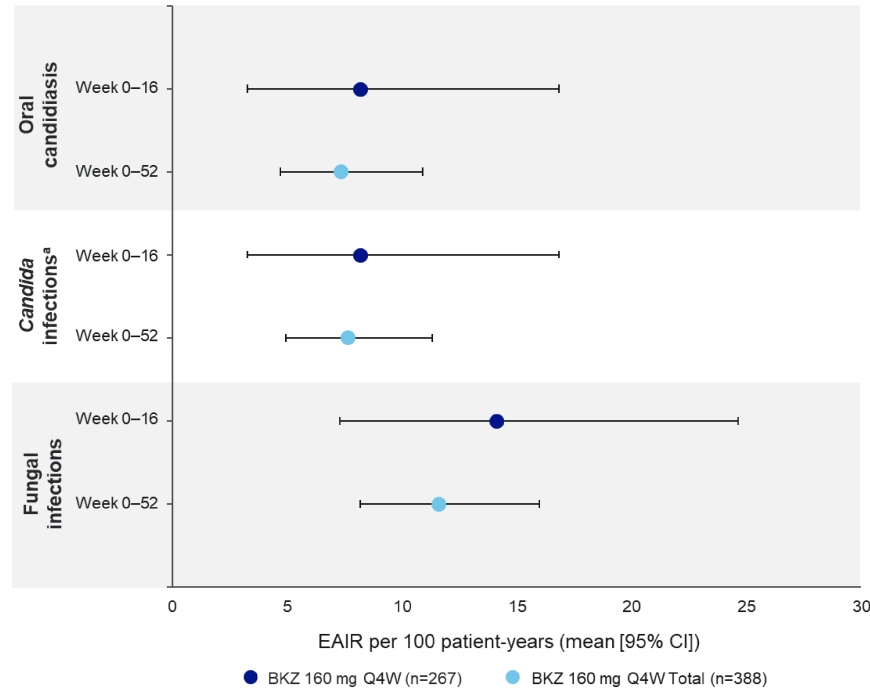

B) Frequency of recurrent fungal infections, recurrent candidiasis and *Candida* infections leading to study discontinuation by treatment period

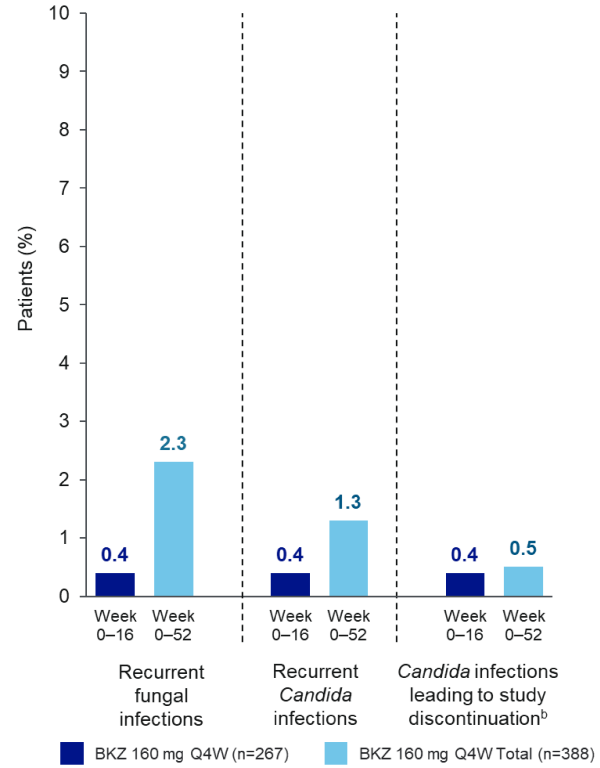

2

C) Recurrence of fungal infections through 52 weeks

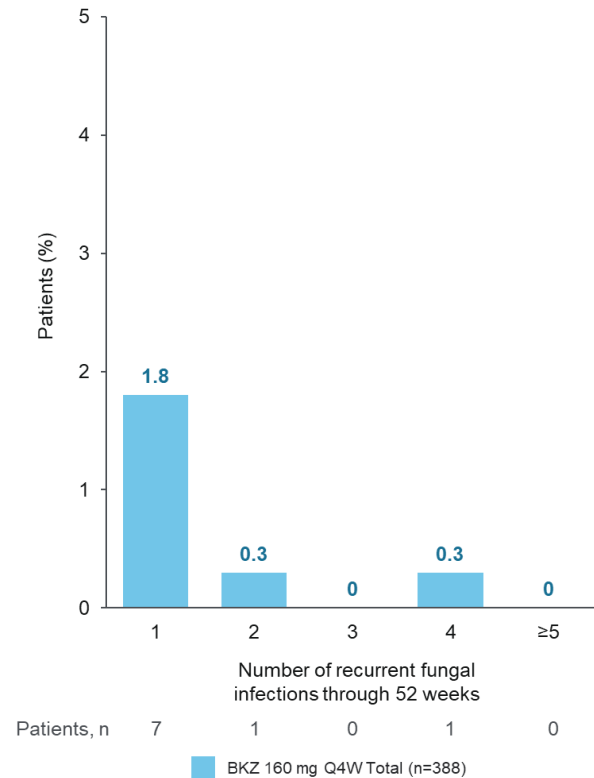D) Recurrence of *Candida* infections through 52 weeks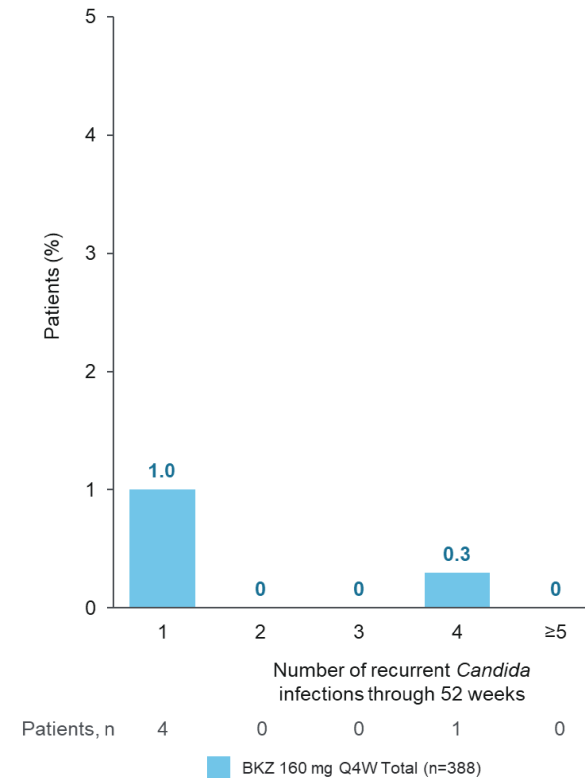

1

- 2 Safety set (all randomised subjects who received at least one dose of the study drug); one placebo-randomised patient withdrew from the study before receiving study drug.  
 3 BKZ 160 mg Q4W includes patients randomised to bimekizumab. BKZ 160 mg Q4W Total includes all patients that received  $\geq 1$  dose of bimekizumab, including those who  
 4 switched from placebo at Week 16. No fungal infections were reported in placebo-randomised patients prior to Week 16. [a] 24 of the 25 reported *Candida* infections were oral

1 candidiasis; [b] 2 oral candidiasis, 1 during the double-blind period and 1 during the open label period. BKZ: bimekizumab; CI: confidence interval; EAIR: exposure-adjusted  
2 incidence rate; Q4W: every 4 weeks.



### 1 Supplementary Figure 3. Change in individual ACR components at Week 52 (MI)

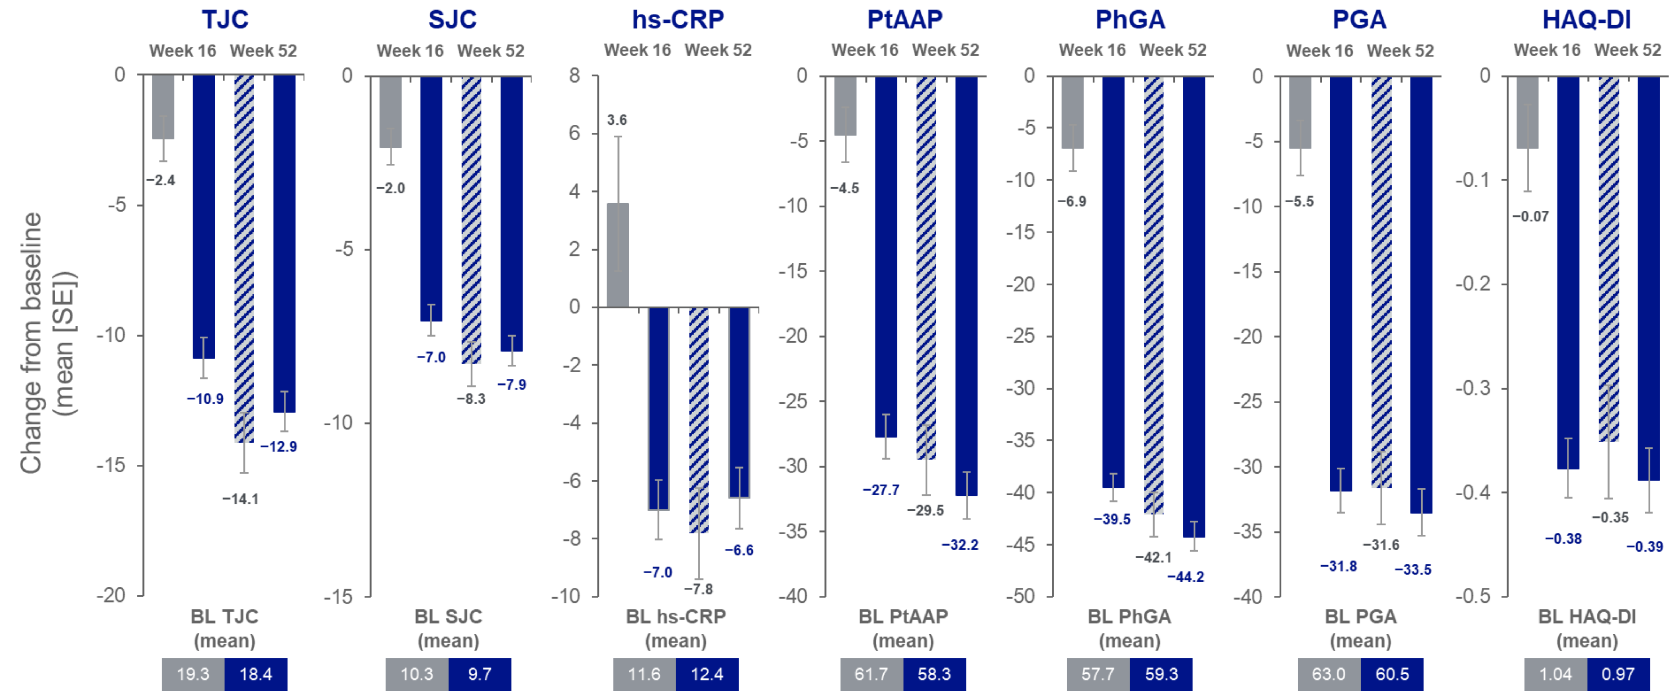

■ → ▨ Placebo/BKZ 160 mg Q4W; n=133 ■ BKZ 160 mg Q4W; n=267

2

3 Previously reported data through Week 16 included for reference.<sup>14</sup> Randomised set. BKZ: bimekizumab; BL: baseline; HAQ-DI: Health Assessment Questionnaire-Disability

4 Index; hs-CRP: high-sensitivity C-reactive protein; MI: multiple imputation; PGA: Patient's Global Assessment; PhGA: Physician's Global Assessment; PtAAP: Patient's

5 Assessment of Arthritis Pain; Q4W: every four weeks; SE: standard error; SJC: swollen joint count; TJC: tender joint count.

1 **Supplementary Figure 4. DAPSA and PASDAS responses over time to Week 52 (WCI)**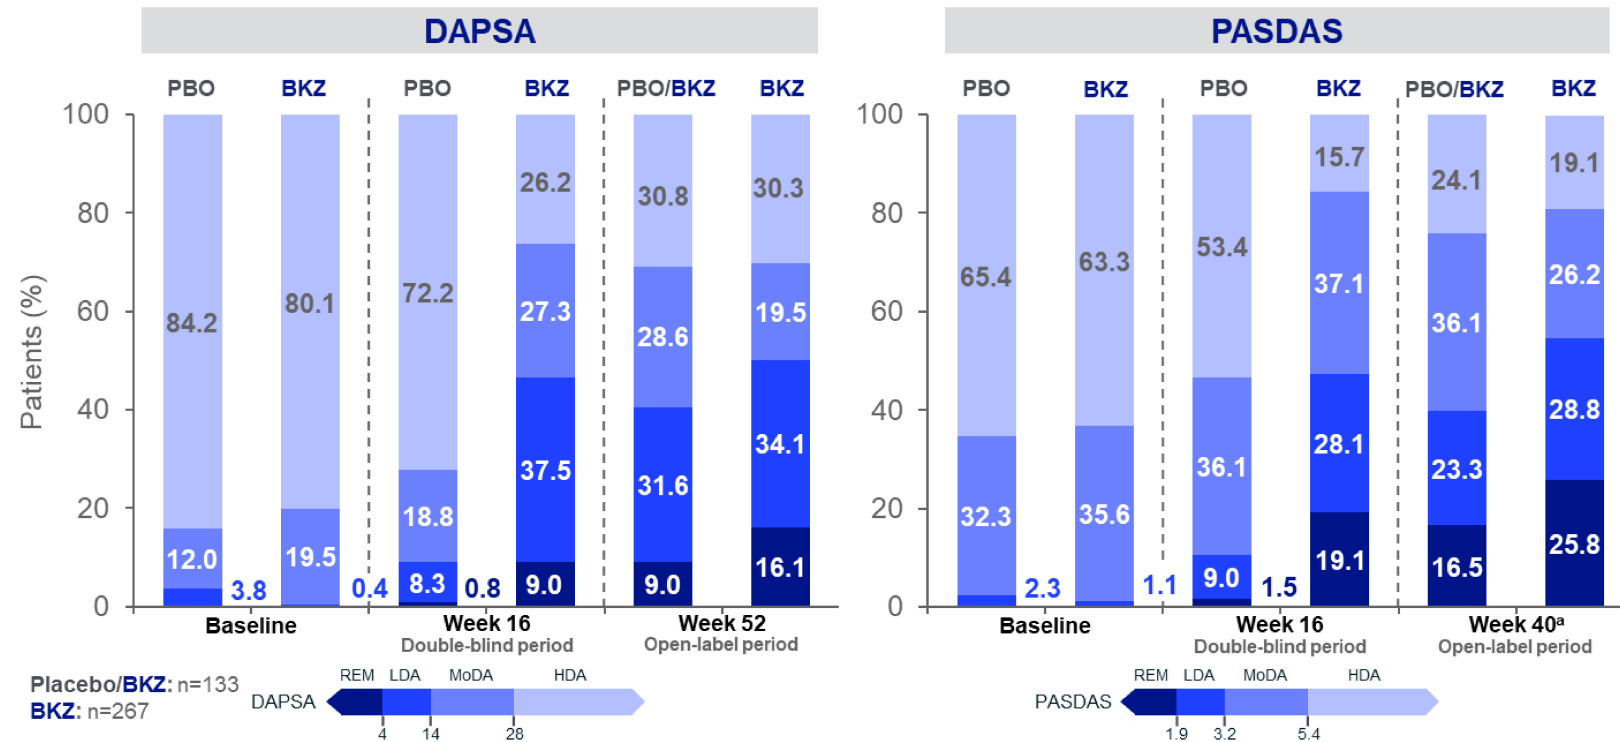

2

3 Randomised set. [a] Data not collected at Week 52. BKZ: bimekizumab; DAPSA: Disease Activity Index for Psoriatic Arthritis; HDA: high disease activity; LDA: low disease  
4 activity; MoDA: moderate disease activity; PASDAS; Psoriatic Arthritis Disease Activity Score; Q4W: every 4 weeks; REM: remission; WCI: worst category imputation.
